# Supplementary material
Source: PubMed Central journal article supplement (PMC2896780)
Supplement: mmc1.pdf [file mmc1.pdf]

## Supplemental Data

### Genomic Duplication and Overexpression of *TJP2*/*ZO-2*

### Leads to Altered Expression of Apoptosis Genes

### in Progressive Nonsyndromic Hearing Loss *DFNA51*

Tom Walsh, Sarah B. Pierce, Danielle R. Lenz, Zippora Brownstein, Orit Dagan-Rosenfeld, Hashem Shahin, Wendy Roeb, Shane McCarthy, Alex S. Nord, Carlos R. Gordon, Ziva Ben-Neriah, Jonathan Sebat, Moien Kanaan, Ming K. Lee, Moshe Frydman, Mary-Claire King, and Karen B. Avraham

#### Figure S1. Expression of *FAM189A2* in family T relatives.

Expression of *TJP2* transcript relative to the control gene *UBC* in lymphoblasts of family T relatives. Blue bars represent results from individuals without the duplication; red bars represent results for individuals with the duplication. Individuals are labeled as in Figure 1. Values represent mean  $\pm$  SEM of data from three independent experiments.

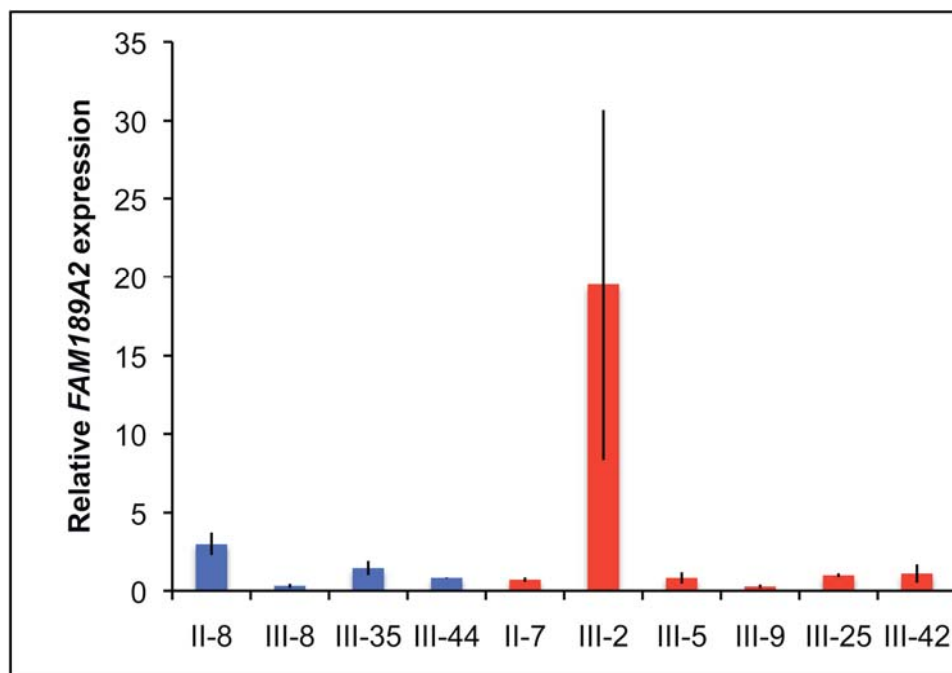

**Figure S2. Expression of Tjp1 in the mouse inner ear.**

Immunofluorescence confocal images of the cochlea were taken at E16.5 and P0 and of the saccule at E16.5. Tjp1 expression (red) is seen at the apical junctions between hair cells and supporting cells (arrowheads). In contrast, Tjp2 is expressed both at the apical edge, associated with tight junctions, and along the basolateral side (see Figure 3). Hair cell cytoplasm and nuclei are marked by myosin VI (MyoVI, green) and DAPI (blue), respectively. Scale bar: 10 $\mu$ m.

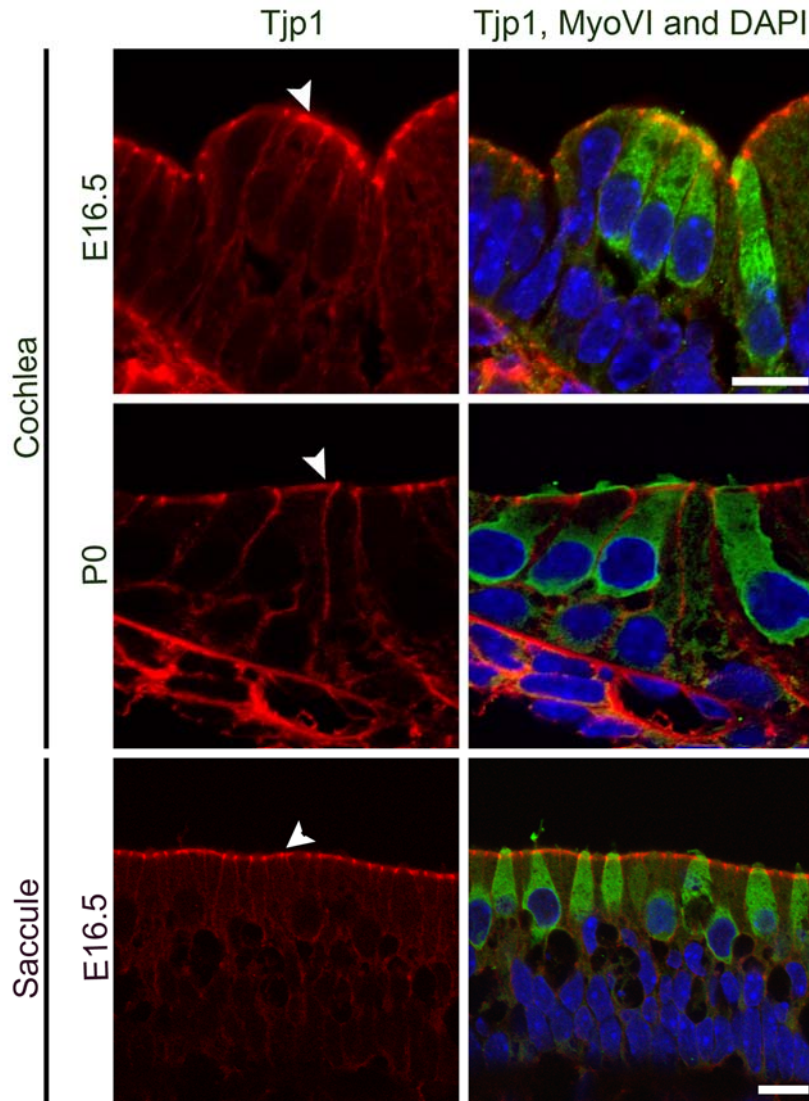

**Table S1. Taqman Assays (Applied Biosystems)**

| Gene    | Assay ID      |
|---------|---------------|
| BAD     | Hs00188930_m1 |
| BAK1    | Hs00940249_m1 |
| BAX     | Hs00180269_m1 |
| BBC3    | Hs00248075_m1 |
| BCL2    | Hs99999018_m1 |
| BCL2A1  | Hs00187845_m1 |
| BCL2L1  | Hs00236329_m1 |
| BCL2L11 | Hs00197982_m1 |
| BCL2L2  | Hs00187848_m1 |
| BID     | Hs00609632_m1 |
| BIK     | Hs00609635_m1 |
| BMF     | Hs00372937_m1 |
| HPRT    | Hs99999909_m1 |
| HRK     | Hs02621354_s1 |
| IL6     | Hs00985639_m1 |
| MCL1    | Hs03043899_m1 |
| PMAIP1  | Hs00560402_m1 |
| REL     | Hs00968436_m1 |
| TBP     | Hs99999910_m1 |
| TJP2    | Hs00178081_m1 |
| TSPO    | Hs00559362_m1 |
| UBC     | Hs00824723_m1 |
| 18s RNA | Hs99999901_s1 |
| Tjp2    | Mm00495620_m1 |
| Hprt    | Mm00446968_m1 |

**Table S2. Expression of apoptosis-related genes in Family T**

Expression of genes on the Human Cellular Apoptosis Gene Signature Plate in lymphoblasts of four family T relatives. One plate was used for each sample. Gene expression is normalized to the *HPRT* endogenous control on each plate ( $2^{\Delta Ct}$ ). Data for three additional endogenous control genes is excluded.

| Gene    | Assay ID      | Unaffected |            | Affected   |            | Fold difference<br>Unaffected/Affected | P<br>(t-test) |
|---------|---------------|------------|------------|------------|------------|----------------------------------------|---------------|
|         |               | II-8       | III-35     | III-42     | III-1      |                                        |               |
| AIFM1   | Hs00377585_m1 | 0.579652   | 0.809283   | 1.085023   | 0.691218   | 0.782                                  | 0.485         |
| AKT1    | Hs00178289_m1 | 1.541792   | 1.382115   | 2.150466   | 2.042125   | 0.697                                  | 0.022         |
| APAF1   | Hs00559441_m1 | 0.242876   | 0.196090   | 0.282235   | 0.280416   | 0.780                                  | 0.118         |
| ATM     | Hs01112307_m1 | 0.841657   | 0.988427   | 1.181084   | 0.832290   | 0.909                                  | 0.676         |
| BAD     | Hs00188930_m1 | 0.002668   | 0.001752   | 0.003608   | 0.001135   | 0.932                                  | 0.914         |
| BAK1    | Hs00940249_m1 | 0.000369   | 0.000602   | 0.000554   | 0.000649   | 0.807                                  | 0.455         |
| BAX     | Hs00180269_m1 | 5.219632   | 3.478779   | 6.297835   | 5.621597   | 0.730                                  | 0.227         |
| BBC3    | Hs00248075_m1 | 0.035715   | 0.022305   | 0.043014   | 0.037262   | 0.723                                  | 0.267         |
| BCL2    | Hs99999018_m1 | 1.189283   | 0.837419   | 1.061078   | 1.568386   | 0.771                                  | 0.432         |
| BCL2L1  | Hs00236329_m1 | 4.907826   | 6.284117   | 3.183286   | 2.484100   | 1.975                                  | 0.070         |
| BCL2L11 | Hs00197982_m1 | 0.220980   | 0.118235   | 0.736959   | 0.678235   | 0.240                                  | 0.012         |
| BID     | Hs00609632_m1 | 0.177385   | 0.139109   | 0.090164   | 0.112417   | 1.562                                  | 0.124         |
| BIRC2   | Hs01112284_m1 | 0.549251   | 0.310514   | 0.270212   | 0.328818   | 1.435                                  | 0.400         |
| CASP3   | Hs00234387_m1 | 1.110276   | 1.042245   | 1.039691   | 0.863442   | 1.131                                  | 0.318         |
| CASP7   | Hs00169152_m1 | 0.293288   | 0.289923   | 0.211158   | 0.260045   | 1.238                                  | 0.150         |
| CASP8   | Hs01018151_m1 | 0.081128   | 0.145250   | 0.095975   | 0.138057   | 0.967                                  | 0.930         |
| CASP9   | Hs00154260_m1 | 0.076552   | 0.077033   | 0.077644   | 0.064211   | 1.083                                  | 0.475         |
| CDKN2A  | Hs00923894_m1 | 0.346951   | 0.257095   | 0.313760   | 0.387122   | 0.862                                  | 0.492         |
| CFLAR   | Hs01116280_m1 | 2.419294   | 2.283057   | 1.899208   | 2.171639   | 1.155                                  | 0.174         |
| CHEK2   | Hs00200485_m1 | 0.024067   | 0.017943   | 0.024613   | 0.034423   | 0.712                                  | 0.279         |
| CHUK    | Hs00175141_m1 | 0.054447   | 0.044317   | 0.049712   | 0.048359   | 1.007                                  | 0.952         |
| CYCS    | Hs01588973_m1 | 0.060419   | 0.023298   | 0.025583   | 0.049668   | 1.113                                  | 0.866         |
| DAPK3   | Hs00154676_m1 | 0.115307   | 0.112635   | 0.114294   | 0.121741   | 0.966                                  | 0.414         |
| DAXX    | Hs00154692_m1 | 0.668304   | 0.561894   | 0.588148   | 0.610244   | 1.027                                  | 0.797         |
| DFFA    | Hs00189336_m1 | 0.550222   | 0.367078   | 0.461731   | 0.557273   | 0.900                                  | 0.671         |
| DFFB    | Hs00237077_m1 | 0.002337   | 0.001912   | 0.002988   | 0.002269   | 0.808                                  | 0.351         |
| DIABLO  | Hs00219876_m1 | 0.590332   | 0.492689   | 0.401400   | 0.594440   | 1.088                                  | 0.726         |
| EGFR    | Hs01076078_m1 | 0.000088   | undetected | undetected | 0.006331   |                                        |               |
| ENDOG   | Hs00172770_m1 | 0.122974   | 0.064901   | 0.144314   | 0.142000   | 0.656                                  | 0.232         |
| F2RL3   | Hs00559732_m1 | undetected | undetected | undetected | undetected |                                        |               |
| FADD    | Hs00538709_m1 | 0.013906   | 0.008240   | 0.017590   | 0.009993   | 0.803                                  | 0.624         |
| FAS     | Hs00531110_m1 | 1.328105   | 0.648589   | 1.746626   | 1.386111   | 0.631                                  | 0.272         |
| FASLG   | Hs00181225_m1 | 0.000423   | 0.000537   | 0.000142   | 0.000436   | 1.663                                  | 0.349         |
| HTRA2   | Hs00234883_m1 | 0.636932   | 0.616228   | 0.602746   | 0.409323   | 1.238                                  | 0.341         |
| IGF1    | Hs01547656_m1 | 0.238379   | 0.047194   | 0.028028   | 0.063800   | 3.110                                  | 0.424         |
| IGF1R   | Hs00609566_m1 | 0.007874   | 0.001634   | 0.045504   | 0.008976   | 0.175                                  | 0.349         |
| IKBKB   | Hs00233287_m1 | 0.613325   | 0.375322   | 0.432597   | 0.448630   | 1.122                                  | 0.697         |
| IKBKE   | Hs01063858_m1 | 0.278201   | 0.122132   | 0.273222   | 0.208390   | 0.831                                  | 0.678         |
| IKBKG   | Hs00415849_m1 | 0.254714   | 0.134865   | 0.287952   | 0.274287   | 0.693                                  | 0.289         |
| IL2     | Hs00174114_m1 | undetected | undetected | undetected | undetected |                                        |               |
| IL6     | Hs00985639_m1 | 0.027684   | 0.036471   | 0.000389   | 0.003418   | 16.854                                 | 0.023         |
| KDR     | Hs00911700_m1 | 0.000325   | undetected | undetected | undetected |                                        |               |
| KIT     | Hs00174029_m1 | 0.000203   | 0.000712   | 0.000210   | 0.004219   | 0.207                                  |               |
| MDM2    | Hs99999008_m1 | 2.576849   | 1.285326   | 2.746608   | 3.339028   | 0.635                                  | 0.258         |

|           |               |            |            |            |            |       |       |
|-----------|---------------|------------|------------|------------|------------|-------|-------|
| MET       | Hs00179845_m1 | 0.000855   | 0.000752   | 0.001068   | 0.000781   | 0.870 | 0.511 |
| NFKB1     | Hs00765730_m1 | 1.207240   | 1.328625   | 0.850417   | 1.370591   | 1.142 | 0.615 |
| NFKB2     | Hs00174517_m1 | 2.698112   | 3.211787   | 2.009516   | 2.439073   | 1.328 | 0.161 |
| NFKBIA    | Hs00153283_m1 | 3.064137   | 4.179580   | 2.294863   | 2.137362   | 1.634 | 0.130 |
| NFKBIB    | Hs00182115_m1 | 0.212677   | 0.274955   | 0.202636   | 0.184918   | 1.258 | 0.262 |
| NFKBIE    | Hs00234431_m1 | 0.112102   | 0.130183   | 0.078188   | 0.128076   | 1.175 | 0.567 |
| P53AIP1   | Hs00223141_m1 | undetected | undetected | undetected | undetected |       |       |
| PARP1     | Hs00242302_m1 | 0.485276   | 0.758037   | 0.502494   | 0.631308   | 1.097 | 0.751 |
| PARP2     | Hs00193931_m1 | 0.341517   | 0.534381   | 0.298945   | 0.404122   | 1.246 | 0.514 |
| PARP3     | Hs00193946_m1 | 0.220284   | 0.281485   | 0.235266   | 0.294190   | 0.948 | 0.775 |
| PARP4     | Hs00173105_m1 | 0.361985   | 0.457845   | 0.374614   | 0.477009   | 0.963 | 0.842 |
| PIK3CA    | Hs00180679_m1 | 0.190615   | 0.260466   | 0.128320   | 0.178805   | 1.469 | 0.237 |
| PIK3CB    | Hs00927728_m1 | 0.109121   | 0.193225   | 0.168385   | 0.110211   | 1.085 | 0.838 |
| PIK3CD    | Hs00192399_m1 | 3.041199   | 5.900900   | 3.576814   | 2.722683   | 1.419 | 0.469 |
| PIK3R1    | Hs00381459_m1 | 0.611614   | 0.647674   | 0.658183   | 0.704655   | 0.924 | 0.220 |
| PIK3R2    | Hs00178181_m1 | 0.690204   | 1.148056   | 0.797417   | 0.518020   | 1.397 | 0.432 |
| PMAIP1    | Hs00560402_m1 | 1.860088   | 2.703486   | 2.798500   | 2.188522   | 0.915 | 0.724 |
| PPID      | Hs00234593_m1 | 0.956213   | 1.061520   | 1.336708   | 0.976860   | 0.872 | 0.513 |
| PRKCA     | Hs00176973_m1 | 0.000734   | 0.025906   | 0.000765   | 0.006440   | 3.697 | 0.530 |
| PRKCB     | Hs00176998_m1 | 2.769941   | 4.073969   | 3.182761   | 2.207195   | 1.270 | 0.466 |
| PRKCD     | Hs01090047_m1 | 1.813187   | 1.967788   | 2.221491   | 2.044374   | 0.886 | 0.175 |
| PRKCE     | Hs00178455_m1 | 0.135493   | 0.232660   | 0.063336   | 0.110785   | 2.114 | 0.215 |
| PRKCZ     | Hs00177051_m1 | 0.001808   | 0.080305   | 0.009205   | 0.003956   | 6.239 | 0.473 |
| REL       | Hs00968436_m1 | 0.914970   | 0.880683   | 0.414743   | 0.383203   | 2.250 | 0.002 |
| RELA      | Hs00153294_m1 | 0.874923   | 1.130390   | 1.056736   | 0.758509   | 1.105 | 0.676 |
| RELB      | Hs00232399_m1 | 0.032807   | 0.032162   | 0.045244   | 0.008291   | 1.214 | 0.786 |
| RIPK1     | Hs00169407_m1 | 0.077125   | 0.106887   | 0.073297   | 0.055343   | 1.430 | 0.252 |
| RPS6KA1   | Hs00177257_m1 | 0.017218   | 0.014178   | 0.020140   | 0.014753   | 0.900 | 0.629 |
| RPS6KA2   | Hs00179731_m1 | 0.045668   | 0.126718   | 0.105155   | 0.092339   | 0.873 | 0.789 |
| RPS6KA3   | Hs00177936_m1 | 0.811471   | 1.129020   | 0.781389   | 0.683040   | 1.325 | 0.288 |
| RPS6KA4   | Hs00177670_m1 | 0.156062   | 0.137609   | 0.188800   | 0.130626   | 0.919 | 0.714 |
| RPS6KA5   | Hs00178054_m1 | 0.084457   | 0.140175   | 0.159208   | 0.069913   | 0.980 | 0.970 |
| SLC25A4   | Hs00154037_m1 | 0.196143   | 0.350072   | 0.485339   | 0.366115   | 0.642 | 0.257 |
| SLC25A5   | Hs00854499_g1 | 1.090449   | 1.370249   | 2.112939   | 1.660216   | 0.652 | 0.133 |
| SLC25A6   | Hs00745067_s1 | 4.456966   | 5.290826   | 10.715795  | 5.644618   | 0.596 | 0.327 |
| TGFB1     | Hs00998133_m1 | 4.117961   | 3.471901   | 3.926650   | 6.796703   | 0.708 | 0.398 |
| TNF       | Hs00174128_m1 | 3.207226   | 5.988626   | 2.990897   | 2.255385   | 1.753 | 0.303 |
| TNFRSF10A | Hs00269492_m1 | 0.009020   | 0.056369   | 0.021699   | 0.015020   | 1.781 | 0.610 |
| TNFRSF1A  | Hs00533560_m1 | 0.535879   | 0.647253   | 0.470664   | 0.214902   | 1.726 | 0.216 |
| TNFSF10   | Hs00234356_m1 | 0.631751   | 0.425309   | 0.394300   | 0.409370   | 1.315 | 0.346 |
| TNFSF12   | Hs00611242_m1 | 0.048411   | 0.027532   | 0.005143   | 0.035771   | 1.856 | 0.444 |
| TP53      | Hs01034249_m1 | 4.191902   | 5.870490   | 6.643640   | 3.426368   | 0.999 | 0.999 |
| TRADD     | Hs00182558_m1 | 0.005742   | 0.003480   | 0.008316   | 0.002098   | 0.885 | 0.874 |
| TRAF2     | Hs00184192_m1 | 0.382484   | 0.685908   | 0.810972   | 0.369651   | 0.905 | 0.853 |
| TSPO      | Hs00559362_m1 | 0.063623   | 0.162907   | 0.554376   | 0.316904   | 0.260 | 0.129 |
| VDAC1     | Hs01019083_m1 | 0.009239   | 0.020123   | 0.030426   | 0.014133   | 0.659 | 0.519 |
| VDAC2     | Hs00762994_s1 | 0.125905   | 0.272117   | 0.260996   | 0.140603   | 0.991 | 0.987 |
| VDAC3     | Hs00366592_m1 | 0.501340   | 0.918354   | 1.104094   | 0.706442   | 0.784 | 0.568 |
